# Supplementary material for: POPPeT: a New Method to Predict the Protection Factor of Backbone Amide Hydrogens
Source: PubMed Central journal article supplement (PMC6318252; doi:10.1007/s13361-018-2068-x), 2018-10-18
Supplement: 13361_2018_2068_MOESM1_ESM.pdf [file 13361_2018_2068_MOESM1_ESM.pdf]

# Supplementary Material

Table S1: Peptides

|    | Aa-residues           | max. $D$ |
|----|-----------------------|----------|
| 1  | 6 $\rightarrow$ 10    | 4        |
| 2  | 11 $\rightarrow$ 17   | 6        |
| 3  | 18 $\rightarrow$ 30   | 12       |
| 4  | 31 $\rightarrow$ 37   | 6        |
| 5  | 38 $\rightarrow$ 40   | 2        |
| 6  | 57 $\rightarrow$ 59   | 2        |
| 7  | 60 $\rightarrow$ 77   | 17       |
| 8  | 81 $\rightarrow$ 83   | 2        |
| 9  | 85 $\rightarrow$ 112  | 27       |
| 10 | 118 $\rightarrow$ 120 | 2        |
| 11 | 121 $\rightarrow$ 128 | 7        |
| 12 | 129 $\rightarrow$ 141 | 12       |

Table S2: Staphylococcal nuclease information

| Residue | logPF | sec. struct. elem. | Hbond acceptor (res.) | Hbond acceptor (atom) | burial | Phenomenological approx. | COREX |
|---------|-------|--------------------|-----------------------|-----------------------|--------|--------------------------|-------|
| Thr2    | -1.10 |                    |                       |                       |        |                          |       |
| Lys5    | 0.43  |                    |                       |                       |        |                          |       |
| Leu7    | 0.38  | no                 | /                     | /                     | 28     | 2.0                      | 0.0   |
| His8    | 0.19  | no                 | HOH                   | O                     | 40     | 4.7                      | 0.0   |
| Lys9    | 0.88  | $\beta$ -strand    | HOH                   | O                     | 45     | 1.5                      | 0.0   |
| Glu10   | 3.90  | $\beta$ -strand    | VAL                   | O                     | 55     | 5.2                      | 1.3   |
| Ala12   | 4.95  | $\beta$ -strand    | ILE                   | O                     | 48     | 5.6                      | 0.0   |
| Thr13   | 4.37  | $\beta$ -strand    | MET                   | O                     | 46     | 5.2                      | 2.4   |
| Leu14   | 1.37  | $\beta$ -strand    | HOH                   | O                     | 46     | 5.1                      | 0.0   |
| Ile15   | 5.04  | $\beta$ -strand    | LYS                   | O                     | 45     | 3.4                      | 2.5   |
| Lys16   | 4.19  | $\beta$ -strand    | LYS                   | O                     | 46     | 2.1                      | 2.9   |
| Ala17   | 1.01  | $\beta$ -strand    | HOH                   | O                     | 51     | 2.7                      | 2.9   |
| Asp19   | 4.16  | bend               | THR                   | O                     | 53     | 3.3                      | 3.6   |
| Gly20   | 1.33  | bend               | HOH                   | O                     | 59     | 3.6                      | 1.1   |
| Asp21   | 4.60  | bend               | /                     | /                     | 57     | 2.8                      | 1.4   |

| Residue | logPF | sec. struct. elem. | Hbond acceptor (res.) | Hbond acceptor (atom) | burial | Phenomenological approx. | COREX |
|---------|-------|--------------------|-----------------------|-----------------------|--------|--------------------------|-------|
| Thr22   | 4.68  | $\beta$ -strand    | /                     | /                     | 63     | 3.8                      | 4.4   |
| Val23   | 4.99  | $\beta$ -strand    | PHE                   | O                     | 62     | 5.3                      | 4.4   |
| Lys24   | 6.71  | $\beta$ -strand    | LYS                   | O                     | 67     | 4.5                      | 3.1   |
| Leu25   | 7.55  | $\beta$ -strand    | MET                   | O                     | 66     | 5.9                      | 4.4   |
| Met26   | 6.86  | $\beta$ -strand    | THR                   | O                     | 64     | 6.1                      | 2.5   |
| Tyr27   | 4.60  | $\beta$ -strand    | GLN                   | O                     | 67     | 5.7                      | 4.4   |
| Lys28   | 0.49  | turn               | HOH                   | O                     | 44     | 2.3                      | 0.0   |
| Gly29   | 1.17  | turn               | HOH                   | O                     | 33     | 0.8                      | 0.0   |
| Gln30   | 5.17  | $\beta$ -strand    | TYR                   | O                     | 42     | 3.0                      | 4.4   |
| Met32   | 6.96  | $\beta$ -strand    | LEU                   | O                     | 53     | 5.1                      | 4.4   |
| Thr33   | 1.09  | $\beta$ -strand    | HOH                   | O                     | 52     | 2.7                      | 0.0   |
| Phe34   | 7.48  | $\beta$ -strand    | VAL                   | O                     | 63     | 5.6                      | 4.4   |
| Arg35   | 7.62  | $\beta$ -strand    | GLY                   | O                     | 68     | 5.5                      | 2.6   |
| Leu36   | 6.37  | $\beta$ -strand    | ASP                   | O                     | 60     | 5.0                      | 5.0   |
| Leu37   | 7.30  | turn               | ALA                   | O                     | 64     | 5.9                      | 3.5   |
| Val39   | 5.95  | $\beta$ -strand    | /                     | /                     | 55     | 5.0                      | 4.9   |
| Asp40   | 4.77  | $\beta$ -strand    | LYS                   | O                     | 49     | 5.9                      | 2.8   |

| Residue | logPF | sec. struct. elem. | Hbond acceptor (res.) | Hbond acceptor (atom) | burial | Phenomenological approx. | COREX |
|---------|-------|--------------------|-----------------------|-----------------------|--------|--------------------------|-------|
| Ala58   | 1.92  | $\alpha$ -helix    | TYR                   | O                     | 60     | 4.4                      | 1.2   |
| Ser59   | 3.08  | $\alpha$ -helix    | GLY                   | O                     | 58     | 5.6                      | 1.2   |
| Phe61   | 4.44  | $\alpha$ -helix    | GLU                   | O                     | 54     | 3.7                      | 1.6   |
| Thr62   | 5.73  | $\alpha$ -helix    | ALA                   | O                     | 61     | 4.4                      | 4.1   |
| Lys63   | 6.70  | $\alpha$ -helix    | SER                   | O                     | 61     | 3.9                      | 4.1   |
| Lys64   | 6.73  | $\alpha$ -helix    | ALA                   | O                     | 58     | 3.7                      | 4.1   |
| Met65   | 6.57  | $\alpha$ -helix    | PHE                   | O                     | 56     | 4.2                      | 4.2   |
| Val66   | 6.97  | $\alpha$ -helix    | THR                   | O                     | 54     | 3.8                      | 4.2   |
| Glu67   | 7.20  | $\alpha$ -helix    | LYS                   | O                     | 54     | 3.8                      | 4.2   |
| Asn68   | 2.35  | no                 | LYS                   | O                     | 41     | 3.1                      | 4.2   |
| Ala69   | 3.95  | no                 | VAL                   | O                     | 47     | 3.3                      | 4.2   |
| Lys70   | 1.70  | bend               | ASP                   | OD1                   | 37     | 1.2                      | 4.2   |
| Lys71   | 3.79  | no                 | ASP                   | OD1                   | 39     | 2.2                      | 4.2   |
| Ile72   | 1.58  | $\beta$ -strand    | HOH                   | O                     | 50     | 5.2                      | 0.0   |
| Glu73   | 7.55  | $\beta$ -strand    | TYR                   | O                     | 58     | 5.0                      | 4.9   |
| Val74   | 5.78  | $\beta$ -strand    | GLU                   | O                     | 68     | 5.5                      | 1.7   |
| Glu75   | 7.65  | $\beta$ -strand    | TYR                   | O                     | 68     | 6.8                      | 3.5   |

| Residue | logPF | sec. struct. elem. | Hbond acceptor (res.) | Hbond acceptor (atom) | burial | Phenomenological approx. | COREX |
|---------|-------|--------------------|-----------------------|-----------------------|--------|--------------------------|-------|
| Phe76   | 3.88  | $\beta$ -strand    | HOH                   | O                     | 61     | 6.7                      | 0.4   |
| Asp77   | 4.61  | no                 | HOH                   | O                     | 62     | 5.5                      | 2.6   |
| Gln80   | 0.06  | no                 | GLN                   | OE1                   | 35     | 4.3                      | 2.6   |
| Thr82   | 2.93  | $\beta$ -bridge    | /                     | /                     | 47     | 1.6                      | 2.6   |
| Asp83   | 4.35  | no                 | ARG                   | O                     | 51     | 5.1                      | 2.6   |
| Gly86   | 2.75  | bend               | ASP                   | O                     | 40     | 1.9                      | 2.6   |
| Arg87   | 4.61  | no                 | ASP                   | OD1                   | 55     | 3.5                      | 2.6   |
| Gly88   | 4.91  | $\beta$ -strand    | THR                   | O                     | 66     | 6.4                      | 2.6   |
| Leu89   | 5.08  | $\beta$ -strand    | ARG                   | O                     | 59     | 6.2                      | 2.6   |
| Ala90   | 7.49  | $\beta$ -strand    | ARG                   | O                     | 66     | 5.8                      | 0.0   |
| Tyr91   | 7.66  | $\beta$ -strand    | GLU                   | O                     | 65     | 6.3                      | 6.0   |
| Ile92   | 7.51  | $\beta$ -strand    | ASN                   | OD1                   | 68     | 4.6                      | 6.8   |
| Tyr93   | 7.53  | $\beta$ -strand    | GLU                   | O                     | 64     | 5.4                      | 4.9   |
| Ala94   | 7.64  | $\beta$ -strand    | LYS                   | O                     | 64     | 5.4                      | 7.6   |
| Asp95   | 4.42  | turn               | LYS                   | O                     | 51     | 4.8                      | 4.3   |
| Gly96   | 1.26  | turn               | HOH                   | O                     | 40     | 1.1                      | 0.0   |
| Lys97   | 5.74  | $\beta$ -strand    | ALA                   | O                     | 40     | 2.1                      | 7.6   |

| Residue | logPF | sec. struct. elem. | Hbond acceptor (res.) | Hbond acceptor (atom) | burial | Phenomenological approx. | COREX |
|---------|-------|--------------------|-----------------------|-----------------------|--------|--------------------------|-------|
| Met98   | 0.28  | $\beta$ -strand    | HOH                   | O                     | 56     | 1.8                      | 0.0   |
| Val99   | 7.32  | $\alpha$ -helix    | ILE                   | O                     | 61     | 4.0                      | 7.5   |
| Asn100  | 7.48  | $\alpha$ -helix    | /                     | /                     | 59     | 5.1                      | 7.6   |
| Glu101  | 7.60  | $\alpha$ -helix    | /                     | /                     | 53     | 3.9                      | 7.6   |
| Ala102  | 7.13  | $\alpha$ -helix    | MET                   | O                     | 57     | 4.6                      | 7.6   |
| Leu103  | 7.36  | $\alpha$ -helix    | VAL                   | O                     | 64     | 4.5                      | 7.6   |
| Val104  | 7.23  | $\alpha$ -helix    | ASN                   | O                     | 63     | 4.7                      | 7.6   |
| Arg105  | 7.17  | $\alpha$ -helix    | GLU                   | O                     | 64     | 3.6                      | 7.6   |
| Gln106  | 7.38  | turn               | ALA                   | O                     | 58     | 3.1                      | 6.2   |
| Gly107  | 7.12  | turn               | VAL                   | O                     | 69     | 5.6                      | 5.8   |
| Leu108  | 6.57  | bend               | LEU                   | O                     | 62     | 5.8                      | 5.7   |
| Ala109  | 7.04  | no                 | /                     | /                     | 58     | 6.2                      | 5.3   |
| Lys110  | 5.77  | $\beta$ -strand    | ASP                   | O                     | 61     | 5.8                      | 2.8   |
| Val111  | 5.90  | $\beta$ -strand    | GLU                   | OE2                   | 52     | 3.8                      | 4.7   |
| Ala112  | 4.38  | no                 | LEU                   | O                     | 48     | 4.7                      | 4.5   |
| Asn119  | 1.70  | no                 | /                     | /                     | 63     | 1.7                      | 4.0   |
| Thr120  | 2.89  | turn               | ASP                   | OD2                   | 53     | 1.1                      | 3.2   |

| Residue | logPF | sec. struct. elem. | Hbond acceptor (res.) | Hbond acceptor (atom) | burial | Phenomenological approx. | COREX |
|---------|-------|--------------------|-----------------------|-----------------------|--------|--------------------------|-------|
| Glu122  | 4.68  | $\alpha$ -helix    | ASN                   | O                     | 56     | 4.4                      | 4.0   |
| Gln123  | 0.20  | $\alpha$ -helix    | HOH                   | O                     | 48     | 4.7                      | 0.0   |
| Leu124  | 1.25  | $\alpha$ -helix    | HOH                   | O                     | 52     | 4.3                      | 0.0   |
| Leu125  | 6.08  | $\alpha$ -helix    | HIS                   | O                     | 53     | 4.3                      | 4.0   |
| Arg126  | 6.29  | $\alpha$ -helix    | GLU                   | O                     | 64     | 4.4                      | 4.1   |
| Lys127  | 4.24  | $\alpha$ -helix    | GLN                   | O                     | 48     | 4.0                      | 4.1   |
| Ser128  | 4.76  | $\alpha$ -helix    | LEU                   | O                     | 56     | 4.7                      | 5.2   |
| Ala130  | 6.05  | $\alpha$ -helix    | ARG                   | O                     | 53     | 3.8                      | 5.7   |
| Gln131  | 4.79  | $\alpha$ -helix    | LYS                   | O                     | 56     | 4.0                      | 5.6   |
| Ala132  | 6.52  | $\alpha$ -helix    | SER                   | O                     | 75     | 5.7                      | 5.5   |
| Lys133  | 6.21  | $\alpha$ -helix    | GLU                   | O                     | 69     | 4.2                      | 5.2   |
| Lys134  | 5.52  | $\alpha$ -helix    | ALA                   | O                     | 57     | 2.8                      | 5.0   |
| Glu135  | 5.02  | turn               | GLN                   | O                     | 53     | 3.3                      | 4.8   |
| Lys136  | 5.06  | turn               | LYS                   | O                     | 55     | 2.8                      | 4.5   |
| Leu137  | 5.23  | no                 | ALA                   | O                     | 64     | 4.8                      | 4.1   |
| Asn138  | 2.57  | 3/10-helix         | HOH                   | O                     | 54     | 1.9                      | 0.0   |
| Ile139  | 5.05  | 3/10-helix         | GLY                   | O                     | 58     | 3.6                      | 3.2   |

| Residue | logPF | sec. struct. elem. | Hbond acceptor (res.) | Hbond acceptor (atom) | burial | Phenomenological approx. | COREX |
|---------|-------|--------------------|-----------------------|-----------------------|--------|--------------------------|-------|
| Trp140  | 4.80  | 3/10-helix         | LEU                   | O                     | 54     | 4.5                      | 3.2   |
| Ser141  | 4.50  | no                 | ASN                   | O                     | 41     | 3.0                      | 3.2   |
| Asn144  | 0.47  |                    |                       |                       |        |                          |       |
| Ala145  | 0.09  |                    |                       |                       |        |                          |       |
| Asp146  | 0.16  |                    |                       |                       |        |                          |       |
| Ser147  | -0.22 |                    |                       |                       |        |                          |       |
| Gly148  | 0.32  |                    |                       |                       |        |                          |       |
| Gln149  | -0.35 |                    |                       |                       |        |                          |       |



Figure S1: Deuteration plots for SNase. The black lines are calculated with the measured protection factors, the red lines with the phenomenological approximation, and the blue lines with COREX.

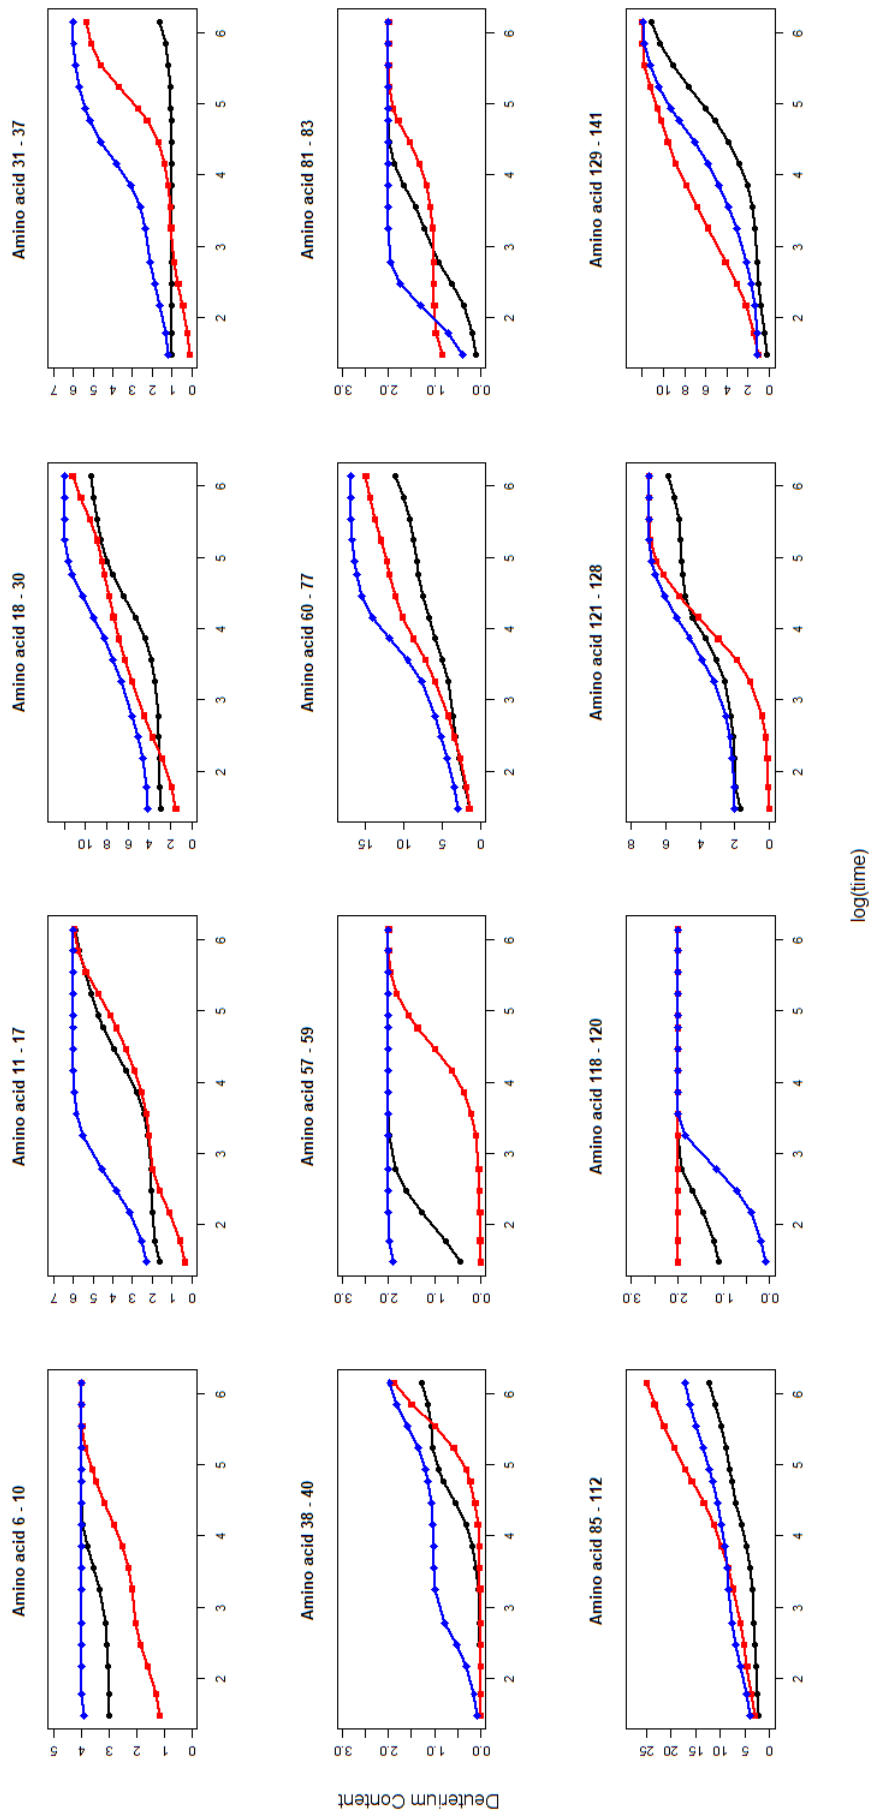

Figure S2: Differences between the measured and calculated deuteration level

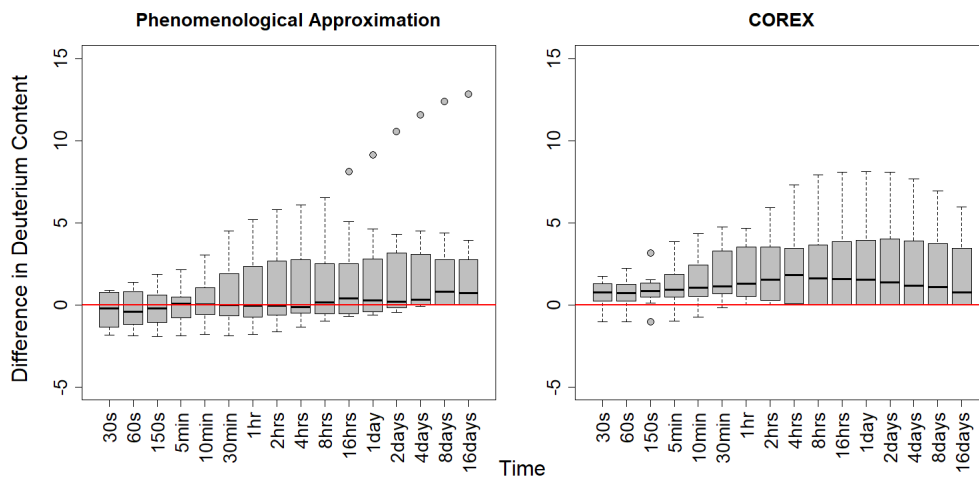

## Association between protection factors and protein motions enabling exchange

Knowledge about the protein motions that enable hydrogen exchange is considered to be essential to understand HX behavior and the link between these motions and PFs. As a consequence, we assessed the association between these motions and the protection factors for 43 SNase amide-hydrogens.

A difference between the PFs of these hydrogens that become exchangeable through local fluctuations ('L'), and hydrogens that get exposed due to unfolding ('U') was observed (Figure S1). The average logPF of the first group is 4.74, while it equals 7.21 for the latter.

We further divided the hydrogens that become exchangeable due to unfolding into three subcategories: unfolding due to the addition of denaturant ('UD'), transition of the EX2 to the EX1-mechanism at elevated pH ('EX1'), and the combination of both ('UD+EX1'). PF-differences can also be seen between these three sub-categories (Figure S3, right), especially between 'UD' and 'UD+EX1', and 'UD' and 'EX1'. The average logPFs for

Table S3: Differences between the measured and calculated deuteration level for peptide 7.

|        | Phenomenological approximation | COREX  |
|--------|--------------------------------|--------|
| 30s    | 0.1416                         | 1.5784 |
| 60s    | -0.1292                        | 1.4301 |
| 150s   | -0.2052                        | 1.5020 |
| 5min   | 0.1467                         | 1.8874 |
| 10min  | 0.7279                         | 2.3851 |
| 30min  | 1.6253                         | 3.3211 |
| 1hr    | 2.1749                         | 4.4080 |
| 2hrs   | 2.8330                         | 5.9243 |
| 4hrs   | 3.3984                         | 7.3098 |
| 8hrs   | 3.6436                         | 7.9321 |
| 16hrs  | 3.7732                         | 8.0785 |
| 1day   | 3.9187                         | 8.1232 |
| 2days  | 4.2770                         | 8.0684 |
| 4days  | 4.4950                         | 7.6746 |
| 8days  | 4.3579                         | 6.9326 |
| 16days | 3.9349                         | 5.9472 |

these three subcategories are 6.72, 7.37 and 7.38.

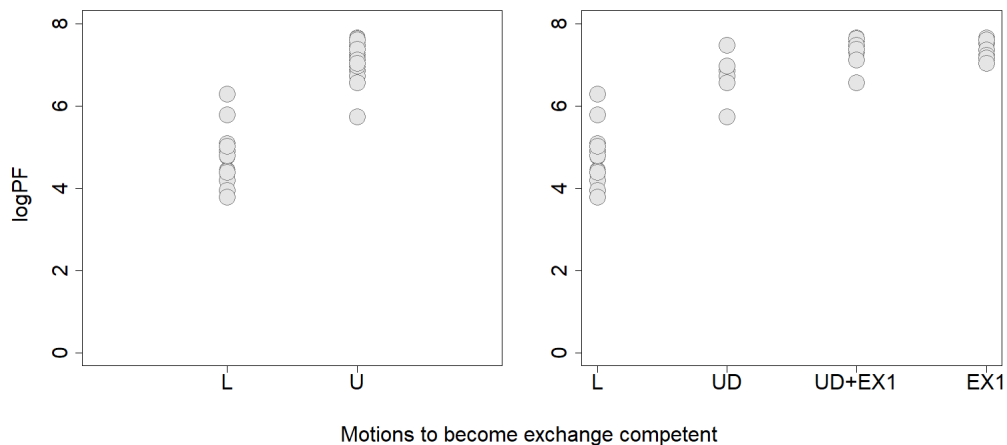

Figure S3: The measured protein factors versus the motions to become exchange competent.

The association between the protection factors and the protein motions that enable HX have been tested with following ANOVA-models:

$$\log\text{PF} = \beta_0 + \beta_1 \times U$$

$$\log\text{PF} = \beta_0 + \beta_1 \times \text{UD} + \beta_2 \times (\text{UD}+\text{EX1}) + \beta_3 \times \text{EX1}$$

For both models, a significant association between the protein motions and the protection factors was found (F-stat = 214;  $p$ -value < 2.2e-16, and F-stat = 87.7;  $p$ -value < 2.2e-16; see also Table S4). This significant association indicates that knowledge about HX-enabling protein motions can be used to predict the PFs of backbone amide hydrogens, possibly in combination with structural features and other factors.

Table S4: F-statistic and coefficients of the linear models to test the association between protection factor and HX enabling protein motions. The standard errors of the coefficients are between brackets.

|                           | ‘L’ and ‘U’ (all) | ‘L’, ‘U’, ‘U+EX1’, and ‘EX1’ |
|---------------------------|-------------------|------------------------------|
| F-stat                    | 214 (df 1,41)     | 87.7 (df 3,39)               |
| <i>p</i> -value           | < 2.2e-16         | < 2.2e-16                    |
| $\beta_0$ (‘L’)           | 4.7447 (0.1361)   | 4.7447 (0.1250)              |
| $\beta_1$ (‘U’ - ‘L’)     | 2.4678 (0.1687)   | 1.9768 (0.2216)              |
| $\beta_2$ (‘U+EX1’ - ‘L’) | /                 | 2.6244 (0.1922)              |
| $\beta_3$ (‘EX1’ - ‘L’)   | /                 | 2.6393 (0.1977)              |

Table S5: Amino-acid residues of SNase used in the test set

|    | Residue | Position | logPF |
|----|---------|----------|-------|
| 1  | Lys     | 16       | 4.19  |
| 2  | Val     | 23       | 4.99  |
| 3  | Met     | 26       | 6.86  |
| 5  | Phe     | 61       | 4.44  |
| 6  | Thr     | 62       | 5.73  |
| 7  | Lys     | 64       | 6.73  |
| 8  | Leu     | 89       | 5.08  |
| 9  | Val     | 99       | 7.32  |
| 10 | Ala     | 102      | 7.13  |
| 11 | Leu     | 103      | 7.36  |
| 13 | Arg     | 105      | 7.17  |
| 14 | Gln     | 106      | 7.38  |
| 15 | Gly     | 107      | 7.12  |

Table S6: Equine oxidized cytochrome c information

|    | Residue | Position | logPF | Unfolding information [48] | protein motions |
|----|---------|----------|-------|----------------------------|-----------------|
| 1  | Lys     | 7        | 4.9   | local                      | L               |
| 2  | Lys     | 8        | 4.3   | local                      | L               |
| 3  | Ile     | 9        | 5.0   | local                      | L               |
| 4  | Phe     | 10       | 7.9   | partial                    | UD              |
| 5  | Val     | 11       | 5.3   | local                      | L               |
| 6  | Gln     | 12       | 4.8   | local                      | L               |
| 7  | Lys     | 13       | 5.6   | local                      | L               |
| 8  | Cys     | 14       | 6.0   | local                      | L               |
| 9  | Ala     | 15       | 5.0   | local                      | L               |
| 10 | His     | 18       | 5.5   | local                      | L               |
| 11 | Gly     | 29       | 5.6   | partial                    | UD              |
| 12 | Leu     | 32       | 6.3   | partial                    | UD              |
| 13 | His     | 33       | 6.1   | partial                    | UD              |
| 14 | Phe     | 36       | 4.8   | partial                    | UD              |
| 15 | Gly     | 37       | 4.5   | partial                    | UD              |
| 16 | Trp     | 59       | 4.8   | global                     | UD + EX1        |
| 17 | Lys     | 60       | 5.8   | local                      | L               |
| 18 | Leu     | 64       | 5.6   | local                      | L               |
| 19 | Met     | 65       | 6.5   | local                      | L               |
| 20 | Glu     | 66       | 4.0   | local                      | L               |
| 21 | Tyr     | 67       | 5.2   | local                      | L               |
| 22 | Leu     | 68       | 8.5   | global                     | UD + EX1        |
| 23 | Glu     | 69       | 5.4   | local                      | L               |
| 24 | Asn     | 70       | 4.6   | local                      | L               |
| 25 | Tyr     | 74       | 4.7   | local                      | L               |
| 26 | Ile     | 75       | 4.5   | local                      | L               |
| 27 | Ile     | 85       | 3.5   | local                      | L               |
| 28 | Arg     | 91       | 6.0   | local                      | L               |
| 29 | Glu     | 92       | 6.1   | local                      | L               |
| 30 | Asp     | 93       | 5.6   | local                      | L               |
| 31 | Leu     | 94       | 7.8   | global                     | UD + EX1        |
| 32 | Leu     | 98       | 10.1  | global                     | UD + EX1        |
| 33 | Lys     | 100      | 4.9   | local                      | L               |
| 34 | Ala     | 101      | 4.7   | local                      | L               |
